# Supplementary material for: Insight into the enhanced catalytic activity of a red mud based Fe2O3/Zn–Al layered double hydroxide in the photo-Fenton reaction
Source: Royal Society of Chemistry journal article supplement (doi:10.1039/d0cy01539c), 2020-01-01
Supplement: d0cy01539c1.pdf [file d0cy01539c1.pdf]

Supporting Information for “Insight into the enhanced catalytic activity of red mud based  
 $\text{Fe}_2\text{O}_3/\text{Zn-Al}$  layered double hydroxide in photo-Fenton reaction”

Qingyong Li<sup>a</sup>, Guangtao Wei<sup>a,b,\*</sup>, Yanjuan Yang<sup>a</sup>, Zhongmin Li<sup>a</sup>, Linye Zhang<sup>a,\*</sup>, Luhua Shao<sup>c</sup>, Shiting  
Lai<sup>a</sup>

<sup>a</sup>School of Chemistry and Chemical Engineering, Guangxi University, Nanning 530004, PR China

<sup>b</sup>Guangxi Key Laboratory of Processing for Non-ferrous Metallic and Featured Materials, Guangxi  
Zhuang Autonomous Region, Nanning 530004, PR China

<sup>c</sup>College of Chemistry and Chemical Engineering, Hunan University, Changsha 410082, PR China

\*Corresponding authors: gtwei@foxmail.com (Guangtao Wei); yezi@gxu.edu.cn (Linye Zhang)

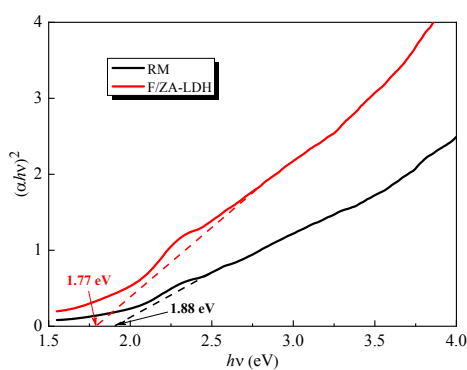

Fig. S1. Kubelka-Munk curves of RM and F/Zn-Al-LDH.

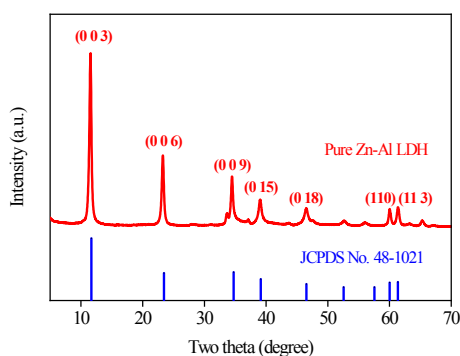

Fig. S2. XRD pattern of pure Zn-Al LDH.

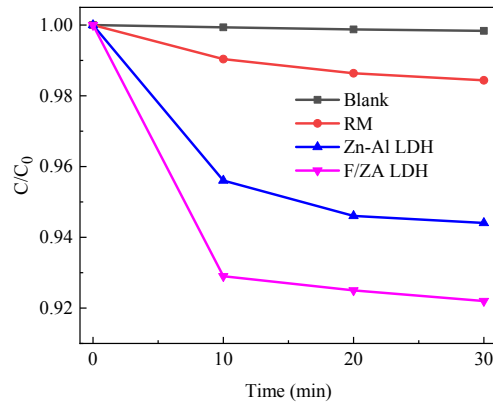

Fig. S3 Adsorption properties of OII in RM, Zn-Al LDH and F/ZA LDH composite in the dark.

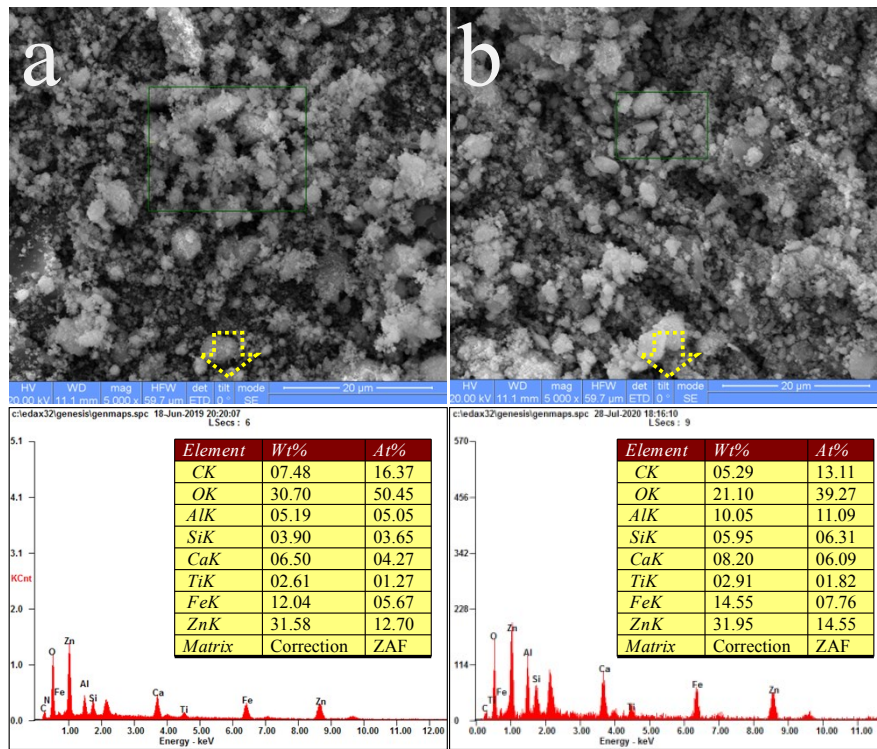

Fig. S4. SEM-EDX images of F/ZA LDH before (a) and after (b) photo-Fenton reaction.

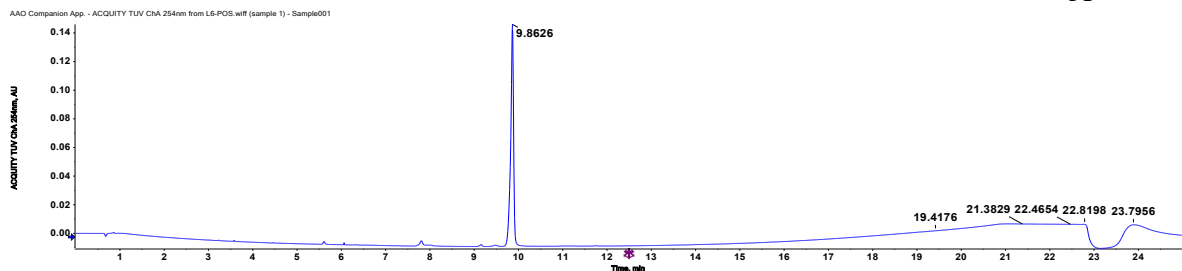

A

Spectrum from L6-POS.wiff (sample 1) - Sample001, Experiment 4, +TOF MS<sup>2</sup> (50 - 1500) from 5.718 min  
Precursor: 268.1 Da, CE: 40.0

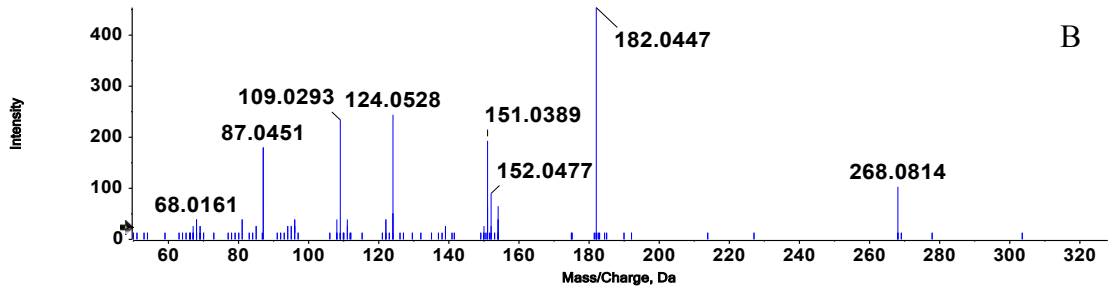

B

Spectrum from L6-POS.wiff (sample 1) - Sample001, Experiment 1, +TOF MS (100 - 2000) from 5.730 min

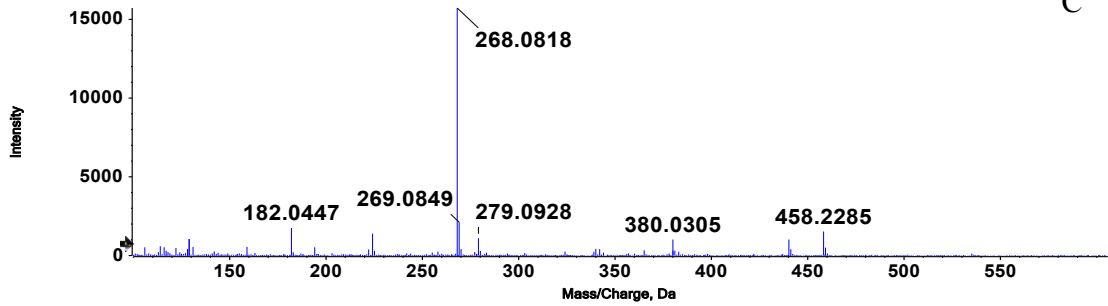

C

Spectrum from L6-POS.wiff (sample 1) - Sample001, Experiment 4, +TOF MS<sup>2</sup> (50 - 1500) from 9.159 min  
Precursor: 274.4 Da, CE: 40.0

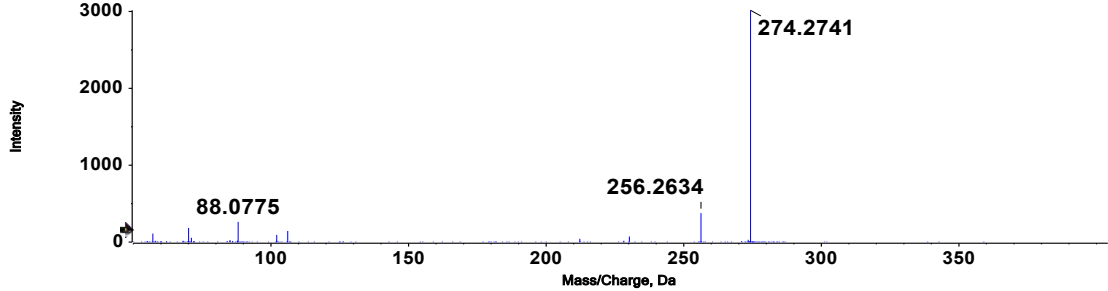

D

Spectrum from L6-POS.wiff (sample 1) - Sample001, Experiment 1, +TOF MS (100 - 2000) from 9.243 min

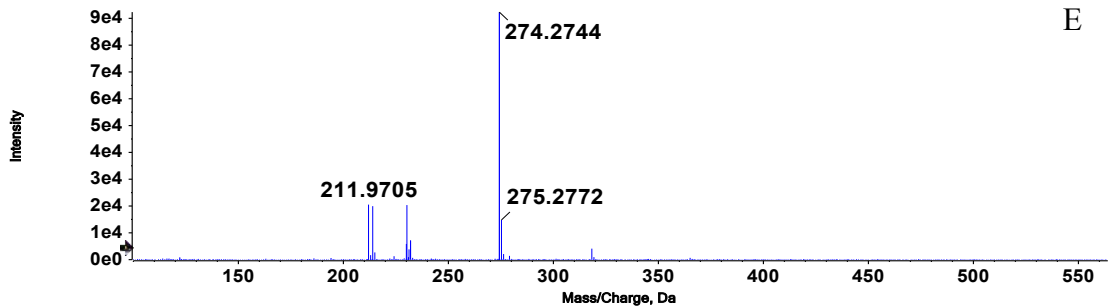

E

Spectrum from L6-POS.wiff (sample 1) - Sample001, Experiment 4, +TOF MS<sup>2</sup> (50 - 1500) from 9.947 min  
Precursor: 205.1 Da, CE: 40.0

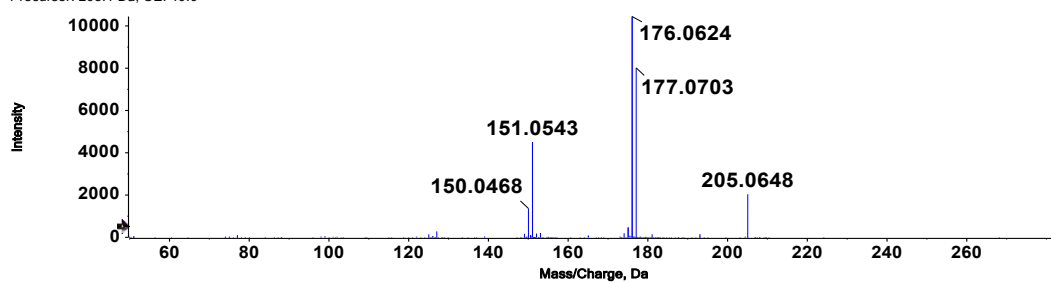

F

Spectrum from L6-POS.wiff (sample 1) - Sample001, Experiment 1, +TOF MS (100 - 2000) from 9.958 min

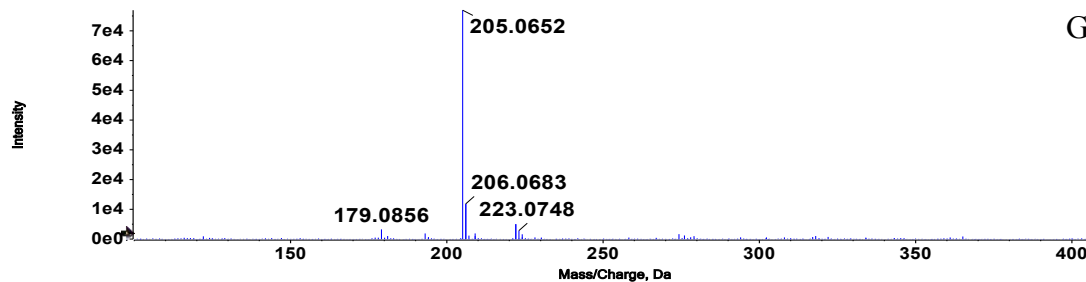

G

Fig. S5. MS spectra of OII and possible intermediates.

Table S1 The detailed information of OII polar intermediates photodegraded by F/ZA-LDH.

| Compounds | Retention time (min) | Elemental composition                              | Measured mass (m/z) | Proposed structure |
|-----------|----------------------|----------------------------------------------------|---------------------|--------------------|
| A         | -                    | C <sub>16</sub> H <sub>11</sub> N <sub>2</sub> NaO | 350.32              |                    |
| B         | 5.718                | C <sub>8</sub> H <sub>6</sub> O <sub>5</sub>       | 182.14              |                    |
| C         | 5.730                | C <sub>8</sub> H <sub>5</sub> NaO <sub>7</sub> S   | 268.18              |                    |
| D         | 9.159                | C <sub>13</sub> H <sub>9</sub> NO <sub>6</sub>     | 275.21              |                    |
| E         | 9.243                | C <sub>6</sub> H <sub>6</sub> NNaO <sub>4</sub> S  | 211.17              |                    |
| F         | 9.947                | C <sub>10</sub> H <sub>8</sub> O <sub>3</sub>      | 176.17              |                    |
| G         | 9.958                | C <sub>11</sub> H <sub>8</sub> O <sub>4</sub>      | 204.18              |                    |
